1            **SARS-CoV-2 Viral RNA Load Dynamics in the Nasopharynx of Infected Children**

2    Kai-qian Kam<sup>1-3</sup> (MBBS) , Koh Cheng Thoon<sup>1-4</sup> (MBBS), Matthias Maiwald<sup>2, 5, 6</sup> (MD), Chia Yin  
3    Chong<sup>1-4</sup> (MBBS), Han Yang Soong<sup>5</sup> (MSc), Liat Hui Loo<sup>5</sup> (PhD), Natalie Woon Hui Tan<sup>1-4</sup>  
4    (MBBS), Jiahui Li<sup>1-3</sup> (MBBS), Karen Donceras Nadua<sup>1-3</sup>(MD), Chee Fu Yung<sup>1, 2, 4</sup>

5

6    <sup>1</sup>Infectious Disease Service, Department of Pediatrics, KK Women’s and Children’s Hospital,  
7    Singapore

8    <sup>2</sup>Duke-NUS Medical School, Singapore

9    <sup>3</sup>Yong Loo Lin School of Medicine, National University of Singapore, Singapore

10    <sup>4</sup>Lee Kong Chian School of Medicine, Imperial College London, Nanyang Technological  
11    University, Singapore

12    <sup>5</sup>Department of Pathology and Laboratory Medicine, KK Women’s and Children’s Hospital,  
13    Singapore

14    <sup>6</sup>Department of Microbiology and Immunology, National University of Singapore, Singapore

15

16    Keywords: SARS-CoV-2, viral load, COVID-19, children, cycle threshold

17

18

NOTE: This preprint reports new research that has not been certified by peer review and should not be used to guide clinical practice.

**SARS-CoV-2 Viral Load in Children**

## 19 **Summary**

20 It is important to understand the temporal trend of pediatric *severe acute respiratory*  
21 *syndrome coronavirus 2* (SARS-CoV-2) viral load to estimate the transmission potential of  
22 children in schools and communities. We determined differences in SARS-CoV-2 viral load  
23 dynamics between nasopharyngeal samples of infected asymptomatic and symptomatic  
24 children. The daily cycle threshold values of SARS-CoV-2 in the nasopharynx of a cohort of  
25 infected children were collected for analysis. Among 17 infected children, 10 (58.8%) were  
26 symptomatic. Symptomatic children, when compared to asymptomatic children, had higher  
27 viral load (mean cycle threshold on day 7 of illness 28.6 versus 36.7,  $p = 0.02$ ). Peak SARS-  
28 CoV-2 viral loads occurred around days 2-3 of illness/days of diagnosis in infected children.  
29 After adjusting for the estimated date of infection, the higher SARS-CoV-2 viral loads in  
30 symptomatic children remained. We postulate that symptomatic SARS-CoV-2-infected  
31 children may have higher transmissibility than asymptomatic children. As peak viral load in  
32 infected children occurred in the early stage of illness, viral shedding and transmission in the  
33 pre-symptomatic phase probable. Our study highlights the importance of screening for  
34 SARS-CoV-2 in children with epidemiological risk factors, even when they are asymptomatic  
35 in order to improve containment of the virus in the community, including educational  
36 settings.

37

## 38 **Key points**

- 39 • Symptomatic children had higher SARS-CoV-2 viral loads in the nasopharynx than  
40 asymptomatic children, which may indicate that symptomatic children have higher  
41 transmissibility.

- 42       • Peak SARS-CoV-2 viral loads occurred early around 2-3 days post symptom onset in  
43       children and therefore, pre-symptomatic transmission of the virus is probable.
- 44       • Symptom based screening for SARS-CoV-2 may not be effective in diagnosing  
45       coronavirus disease 2019 (COVID-19) in children as a proportion of children may be  
46       asymptomatic or pauci-symptomatic.
- 47       • Children with high epidemiological risk factors should be screened or isolated as they  
48       may be carriers of the virus and contribute to transmission.

49

50

51

52

53

54

55

56 The viral load of the novel coronavirus, *severe acute respiratory syndrome coronavirus 2*  
57 (SARS-CoV-2), has been reported to peak within the first week of disease in throat and  
58 sputum samples in the adult population [1-2]. The viral loads in a small group of  
59 asymptomatic infected adults were also shown to be similar to those of symptomatic  
60 infected adults, implying a transmission potential of asymptomatic patients [2]. A  
61 proportion of COVID-19-infected children are known to asymptomatic or have mild to  
62 moderate disease [3-5]. Previously, we reported a paucisymptomatic SARS-CoV-2-infected  
63 infant who presented with high viral load prior to symptom onset, viral shedding up to day  
64 18 of illness and significant environmental viral contamination [6, 7]. A recent study in Korea  
65 also suggests that SARS-CoV-2 can be detected in children for a mean of more than 2 weeks  
66 and a proportion of the infected children are asymptomatic despite high viral load [8]. There  
67 is a need to improve the understanding of the viral load dynamics of SARS-CoV-2 in infected  
68 children so as to postulate the role of children in the transmission of COVID-19 in schools  
69 and the community. In this study, we analyzed the daily trends of SARS-CoV-2 viral load  
70 from nasopharyngeal samples of infected symptomatic and asymptomatic pediatric  
71 patients.

72

73 KK Women's and Children's Hospital (KKH) is an 830-bed hospital that provides care for  
74 approximately 500 children's emergency daily attendances and 12,000 deliveries per year. It  
75 is the primary hospital for evaluation and isolation of COVID-19 in the pediatric population  
76 in Singapore. A line list of confirmed pediatric cases who presented to our institution from  
77 23 March 2020 to 5 April 2020 was extracted from hospital records. Confirmed cases that  
78 were diagnosed by positive SARS-CoV-2 PCR from nasopharyngeal swabs using the real-time  
79 reverse transcription polymerase chain reaction (rRT-PCR) for the E gene were included.

80 Nasopharyngeal swabs were taken daily from the confirmed cases. A cycle threshold (Ct) of  
81 45 is considered to be undetectable for the virus. Age, gender and the Ct values of all  
82 nasopharyngeal swabs for SARS-CoV-2 for each child were also obtained. Most of these  
83 children were contacts of confirmed cases in their household. In our institution, children  
84 were considered to have recovered from COVID-19 and discharged from the hospital when  
85 they had negative SARS-CoV-2 PCR results from 2 nasopharyngeal swabs on consecutive  
86 days.

87

88 The Ct values were reported in relation to the day of illness or day of diagnosis for  
89 symptomatic and asymptomatic patients, respectively (Figure 1A). As an additional analysis  
90 to mitigate bias in timing of detection between symptomatic and asymptomatic cases, we  
91 incorporated an estimated day of infection in Figure 1B. The children were most likely to  
92 have been infected by their household confirmed cases during this early period of the  
93 pandemic in Singapore with detailed contact tracing and testing. Therefore, we used the  
94 date of symptom onset for index household COVID-19 case as the estimated day of infection  
95 for this additional analysis. If this information was missing, we used the average duration  
96 calculated from patients with the information available.

97

98 Nasopharyngeal swabs were collected using Mini UTM Kits (Copan, Brescia, Italy) with  
99 flocked swabs and 1 mL of universal transport medium. From this medium, 200  $\mu$ L was used  
100 for extraction of viral nucleic acids using the EZ1 Virus Mini Kit v2.0 (Qiagen, Hilden,  
101 Germany) into 60  $\mu$ L of eluate. rRT-PCR targeting the SARS-CoV-2 E gene was performed  
102 according to the method by Corman et al [9]. All reactions were run on a QuantStudio 5  
103 instrument (ThermoFisher Applied Biosystems, Foster City, CA, USA). A volume of 5  $\mu$ L was

104 used in PCRs, and with conversion factors, this represented 1/60th of the swab contents per  
105 reaction. The positive control consisted of a plasmid with a SARS-CoV-2 E gene insert,  
106 adjusted to 1000 copies per reaction. During the study period, the mean Ct value of all  
107 positive control PCRs was 29.86 and the standard deviation was  $\pm 0.68$ . Thus, with the  
108 conversion factor, a Ct value of 29.86 corresponded to approximately  $6 \times 10^4$  virus genome  
109 copies per swab. All first-time positive results for each individual patient were confirmed by  
110 a second PCR assay, the Fortitude PCR kit (A\*Star, Singapore) on a CFX96 thermocycler (Bio-  
111 Rad, Hercules, CA, USA).

112  
113 Continuous variables were normal in distribution; they were expressed as mean (range) and  
114 compared with 2 samples T test. Categorical variables were expressed as numbers (%). A  
115 two-sided  $\alpha$  of less than 0.05 was considered statistically significant. Statistical analyses  
116 were done using the SPSS software, version 23 (IBM, Armonk, NY, USA). The average Ct  
117 values for each day of illness and diagnosis were obtained for the asymptomatic and  
118 symptomatic children. The graphs were drawn to compare the average Ct trends on each  
119 day of illness/diagnosis between the two groups. The study was approved by the  
120 institutional ethics review board. Written informed consent was waived in light of the need  
121 to inform public health outbreak control policies.

122  
123 From 23 March to 5 April 2020, 17 children with confirmed COVID-19 via rRT-PCR E gene  
124 assay were cared for as inpatients at our institution. The median age of the cohort was 7.7  
125 years old (range: 0.3 to 15.8 years old). In our cohort, 10 (58.8%) of the children were  
126 symptomatic. All symptomatic children had a mild illness with upper respiratory tract  
127 infection and their symptoms resolved by day 5 of illness. No complications or evidence of

128 pneumonia were observed. All asymptomatic children remained well with no development  
129 of symptoms until discharge.

130

131 The mean duration of viral shedding was about 16 days (range: 3-29 days) in our cohort.

132 Symptomatic children had longer durations of viral shedding but this was not statistically

133 significant (mean 17 days versus 14 days,  $p = 0.48$ ). Higher viral loads were observed in

134 symptomatic children when compared to asymptomatic children (mean cycle threshold on

135 day 7 of illness 28.6 versus 36.7, 95% CI = 1.9 to 14.3,  $p = 0.02$ ). Peak SARS-CoV-2 viral loads

136 occurred around days 2-3 of illness in symptomatic children or days of diagnosis in

137 asymptomatic children, respectively (Figure 1A). After adjusting for the estimated date of

138 infection, SARS-CoV-2 viral loads remained higher in symptomatic children when compared

139 to asymptomatic children, but the durations of viral shedding between the two groups were

140 similar (Figure 1B).

141

142 We present the daily nasopharyngeal SARS-CoV-2 Ct values of the asymptomatic and

143 symptomatic infected children in our cohort. The mean duration of viral shedding was 16

144 days and the longest duration of viral shedding was 30 days in a previously symptomatic

145 child. The detection of early viral peaks at days 2-3 of illness in our pediatric cases concurs

146 with data from limited paediatric studies [10, 11]. This raises the possibility that children

147 with COVID-19 may transmit the virus to others during the early stage of the illness.

148 Although we were unable to establish if the virus was already detectable in high viral loads

149 in the pre-symptomatic phase in our cohort of patients, the high viral load in our

150 symptomatic children in the very early stage of illness implies the transmission potential of

151 pre-symptomatic children if they are not identified and isolated in the pre-symptomatic  
152 phase.

153

154 Contrary to reports of COVID-19-infected adults showing similar viral load trends in  
155 asymptomatic and symptomatic infected individuals [2], our findings revealed that  
156 symptomatic COVID-19-infected children may have higher viral loads in the initial stage of  
157 illness than asymptomatic children. Mi et al recently reported similar findings from a  
158 smaller cohort in South Korea but daily swab data was not available [11]. Importantly, even  
159 after we accounted for the estimated day of infection for both symptomatic and  
160 asymptomatic children, the viral loads continued to be higher in symptomatic children. This  
161 suggests that symptomatic children may have a higher risk of transmitting the virus than  
162 asymptomatic children. This finding and our daily viral load data could be used to guide  
163 modelling work to help understand the role of children in driving transmission in schools and  
164 the wider population, in order to inform public health interventions including future  
165 vaccination policies.

166

167 We found that the majority of patients had detectable virus even on day 7 of  
168 illness/diagnosis and the mean duration of viral shedding was 16 days. If testing resources  
169 need to be preserved, we suggest that infected children do not need to be tested for the  
170 virus for at least the first 7 days of illness/diagnosis to confirm they no longer need to be  
171 isolated unless clinically indicated. Isolation of pediatric COVID-19 cases to prevent ongoing  
172 transmission may need to continue for at least 2 to 3 weeks. Children with epidemiological  
173 links to confirmed cases in the household and schools should be placed under quarantine



174 for a least 2 weeks, as these children may shed the virus during the asymptomatic or pre-  
175 symptomatic phase.

176

177 Although our sample size is limited, daily nasopharyngeal specimens were taken for every  
178 case which accounted for individual level variations in viral shedding patterns in infected  
179 children. The findings from our cohort may not be representative of other pediatric  
180 populations but our cohort included multi-ethnic patients (Chinese, Malay, Indian, Eurasian  
181 ethnicities). Our PCR assay was not set up to be exactly quantitative, but approximate viral  
182 loads can be gleaned from Ct values, using the dilution factors and the fact that positive  
183 controls contained 1000 copies of a plasmid per reaction. As per all observational studies, it  
184 is difficult to ascertain the exact day of acquisition for the infected children. For our  
185 secondary analysis (Figure 1B), we assumed that the children were infected on the onset  
186 date of the index household COVID-19 case. Epidemiological data from Singapore's  
187 systematic contact tracing, testing and isolation policy supported this assumption during the  
188 early phase of the pandemic [12].

189

190 In conclusion, our study found that symptomatic infected children have higher viral RNA  
191 loads than asymptomatic children. We also detected peak viral load occurred very early in  
192 children within about 2 to 3 days of infection which would suggest probable potential for  
193 transmission before symptom onset. These findings highlights the importance of screening  
194 for SARS-CoV-2 in children with epidemiological risk factors, even when they are  
195 asymptomatic in order to improve containment of the virus in the community including  
196 educational settings.

197

198 Acknowledgement

199 The authors would like to thank all the staff of the Microbiology Section, Department of  
200 Pathology and Laboratory Medicine, KK Women's and Children's Hospital for their  
201 dedication and commitment in the challenging working conditions in this COVID-19  
202 pandemic.

203

204 Competing interests

205 The authors declare no competing interests.

206

207 Funding/support

208 Nil

209

210 **References**

211

212 1. **Pan Y, et al.** Viral load of SARS-CoV-2 in clinical samples. *Lancet Infect Dis* 2020;20(4):411-  
213 412.

214

215 2. **Zou L, et al.** SARS-CoV-2 viral load in upper respiratory specimens of infected patients. *N*  
216 *Engl J Med* 2020;382(12):1177-1179.

217

218 3. **Cai J, et al.** A case series of children with 2019 novel coronavirus infection: clinical and  
219 epidemiological features. *Clin Infect Dis*. Published online: 28 February 2020.

220 doi:10.1093/cid/ciaa198.

221

222 4. **Qiu H, et al.** Clinical and epidemiological features of 36 children with coronavirus disease  
223 2019 (COVID-19) in Zhejiang, China: an observational cohort study. *Lancet Infect Dis*

224 2020;20(6):689-696.

225

226 5. **Dong Y, et al.** Epidemiology of COVID-19 among children in China. *Pediatrics*

227 2020;145(6):e20200702.

228

229 6. **Kam KQ, et al.** A well infant with coronavirus disease 2019 with high viral load. *Clin Infect*

230 *Dis* 2020;71(15):847-849.

231

232 7. **Yung CF, et al.** Environment and personal protective equipment tests for SARS-CoV-2 in

233 the isolation room of an infant with infection. *Ann Intern Med* 2020;173(3):240-242.

- 234 8. **Han MS, et al.** Clinical characteristics and viral RNA detection in children with coronavirus  
235 disease 2019 in the Republic of Korea. *JAMA Pediatr.* Published online: 28 August 2020.  
236 doi:10.1001/jamapediatrics.2020.3988.  
237
- 238 9. **Corman VM, et al.** Detection of 2019 novel coronavirus (2019-nCoV) by real-time RT-PCR.  
239 *Euro Surveill* 2020;25(3):2000045.  
240
- 241 10. **Yonker LM, et al.** Pediatric SARS-CoV-2: clinical presentation, infectivity, and immune  
242 responses. *J Pediatr.* Published online: 18 August 2020. doi:10.1016/j.jpeds.2020.08.037.  
243
- 244 11. **Han MS, et al.** Viral RNA Load in mildly symptomatic and asymptomatic children with  
245 COVID-19, Seoul. *Emerg Infect Dis.* Published online: 4 June 2020.  
246 doi:10.3201/eid2610.202449.  
247
- 248 12. **Pung R, et al.** Investigation of three clusters of COVID-19 in Singapore: implications for  
249 surveillance and response measures. *Lancet* 2020;395(10229):1039-1046.  
250  
251  
252

253 **Figure 1: SARS-CoV-2 temporal viral load dynamics in the nasopharynx of pediatric COVID-**  
254 **19 patients**

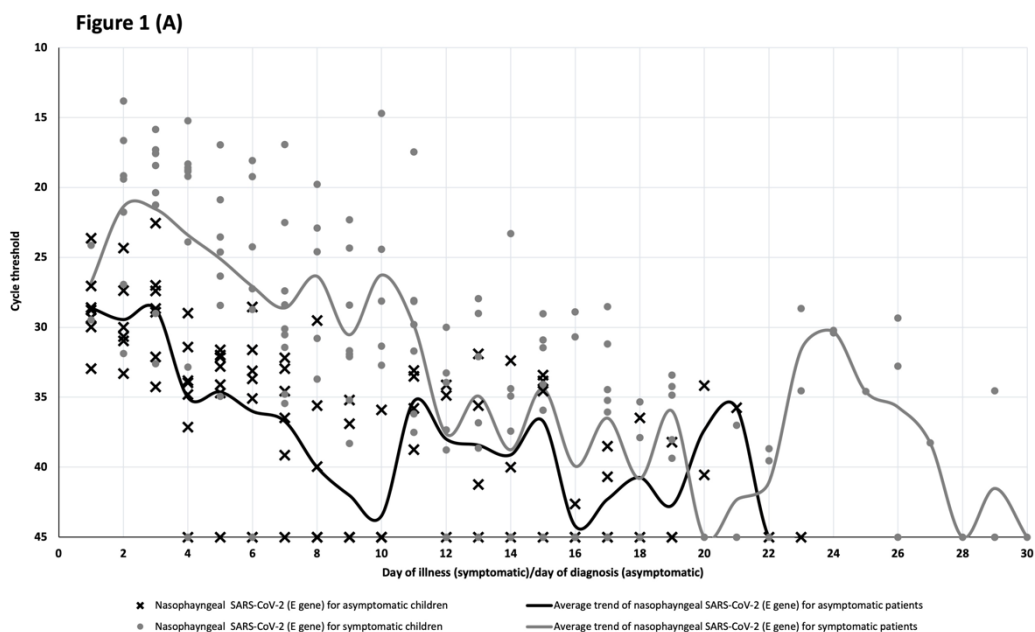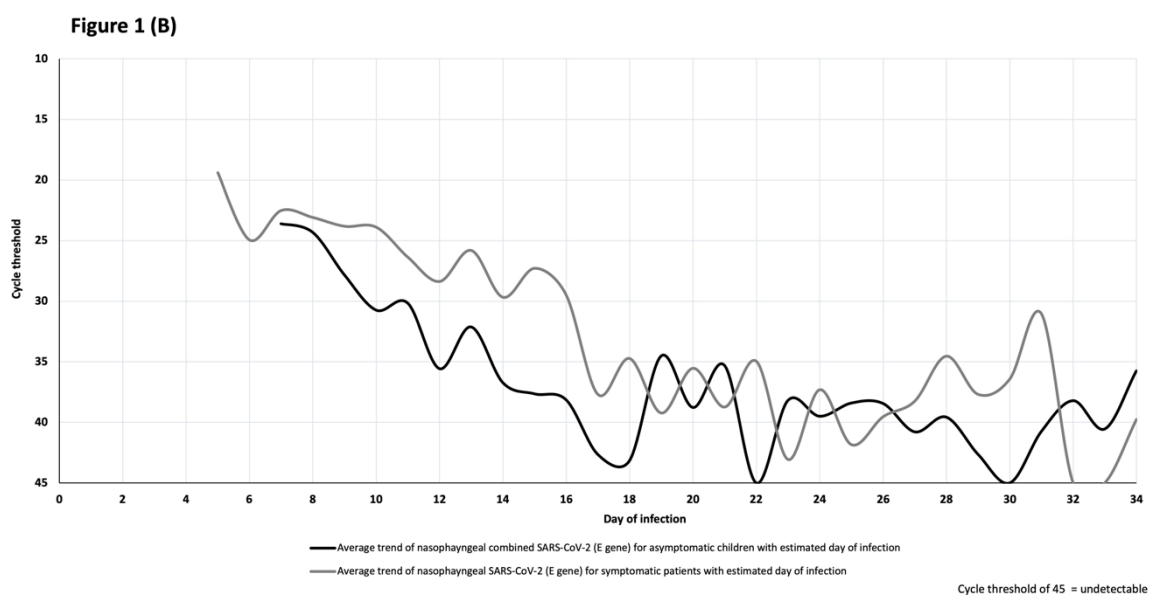

255 (A) Plotted against day of illness (symptomatic children) or day of diagnosis (asymptomatic  
256 children).

257 (B) Plotted against estimated day of infection.

258 SARS-CoV-2: *severe acute respiratory syndrome coronavirus 2*
